# Supplementary material for: Comparative evaluation of rapidity of action of benzydamine hydrochloride 0.3% oromucosal spray and benzydamine hydrochloride 3 mg lozenges in patients with acute sore throat: A phase IV randomized trial
Source: PubMed Central journal article supplement (PMC10063282; doi:10.1097/md.0000000000033367), 2023-03-31
Supplement: medi-102-e33367-s002.pdf [file medi-102-e33367-s002.pdf]

**Supplemental Table 2: Analysis populations**

|                                                                   | <b>BZN SPRAY</b> | <b>BZN LOZENGES</b> |
|-------------------------------------------------------------------|------------------|---------------------|
| <b>Safety population</b>                                          | <b>181</b>       | <b>182</b>          |
| <b>m-ITT population</b>                                           | <b>181</b>       | <b>182</b>          |
| a. patients included in the Safety population                     | 181              | 182                 |
| b. minus 8 major protocol violators                               | 7                | 1                   |
| <b>PP population</b>                                              | <b>174</b>       | <b>181</b>          |
| a. patients included in the PP population                         | 174              | 181                 |
| b. minus 66 protocol deviators                                    | 22               | 44                  |
| <b>m-PP population for exploratory purposes after 120 minutes</b> | <b>152</b>       | <b>137</b>          |
