# Supplementary material for: Comparative evaluation of rapidity of action of benzydamine hydrochloride 0.3% oromucosal spray and benzydamine hydrochloride 3 mg lozenges in patients with acute sore throat: A phase IV randomized trial
Source: PubMed Central journal article supplement (PMC10063282; doi:10.1097/md.0000000000033367), 2023-03-31

**Supplemental Figure 1:** Mean TOTPAR for STRRS from 2 to 240 after administration of benzydamine HCl spray or benzydamine HCl lozenges in m-ITT, PP and m-PP populations.

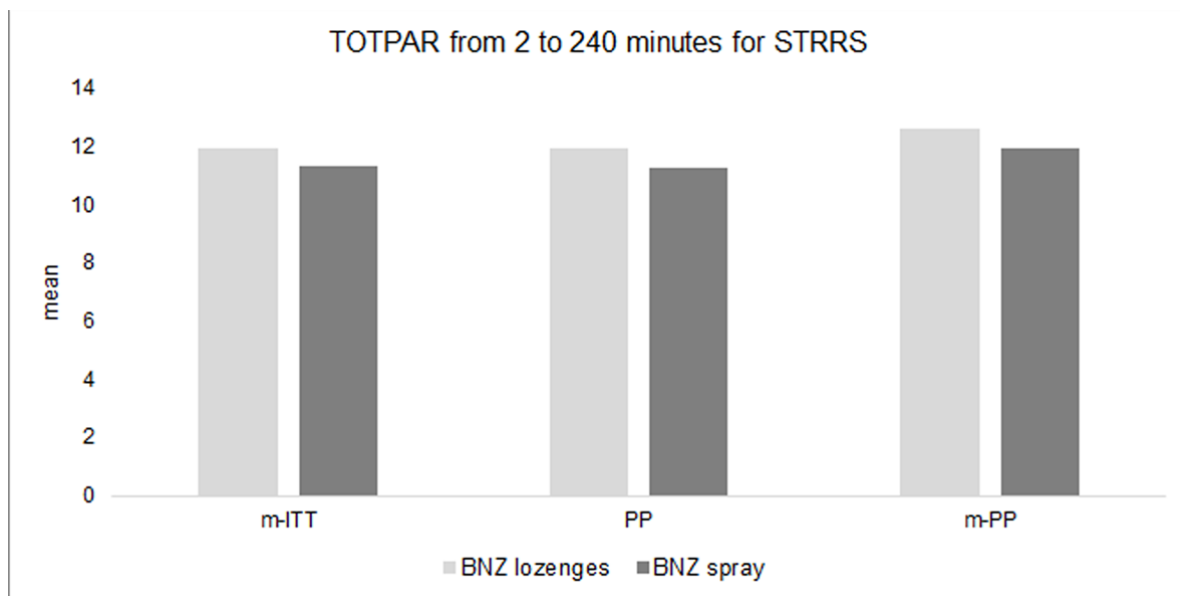

Supplement: medi-102-e33367-s003.pdf [file medi-102-e33367-s003.pdf]
